# Supplementary material
Source: PubMed Central journal article supplement (PMC9757913)
Supplement: mmc1.pdf [file mmc1.pdf]

Supplementary Information (SI) for

# Increased ozone pollution alongside reduced nitrogen dioxide concentrations during Vienna's first COVID-19 lockdown: Significance for air quality management

Marlon Brancher <sup>§,\*</sup>

*§ WG Environmental Health, Department of Biomedical Sciences, University of Veterinary Medicine Vienna, Veterinärplatz 1, A-1210 Vienna, Austria*

\* Corresponding author.

✉ [Marlon.Brancher@vetmeduni.ac.at](mailto:Marlon.Brancher@vetmeduni.ac.at)

The present SI file includes the following:

- *Figure S1*
- *Figure S2*
- *Figure S3*
- *Figure S4*
- *Figure S5*
- *Figure S6*
- *Figure S7*
- *Figure S8*
- *Table S1*
- *Table S2*
- *Table S3*
- *Table S4*

Figure S1. Frequency of missing values per air quality monitor per year. Pollutant: NO<sub>2</sub>.

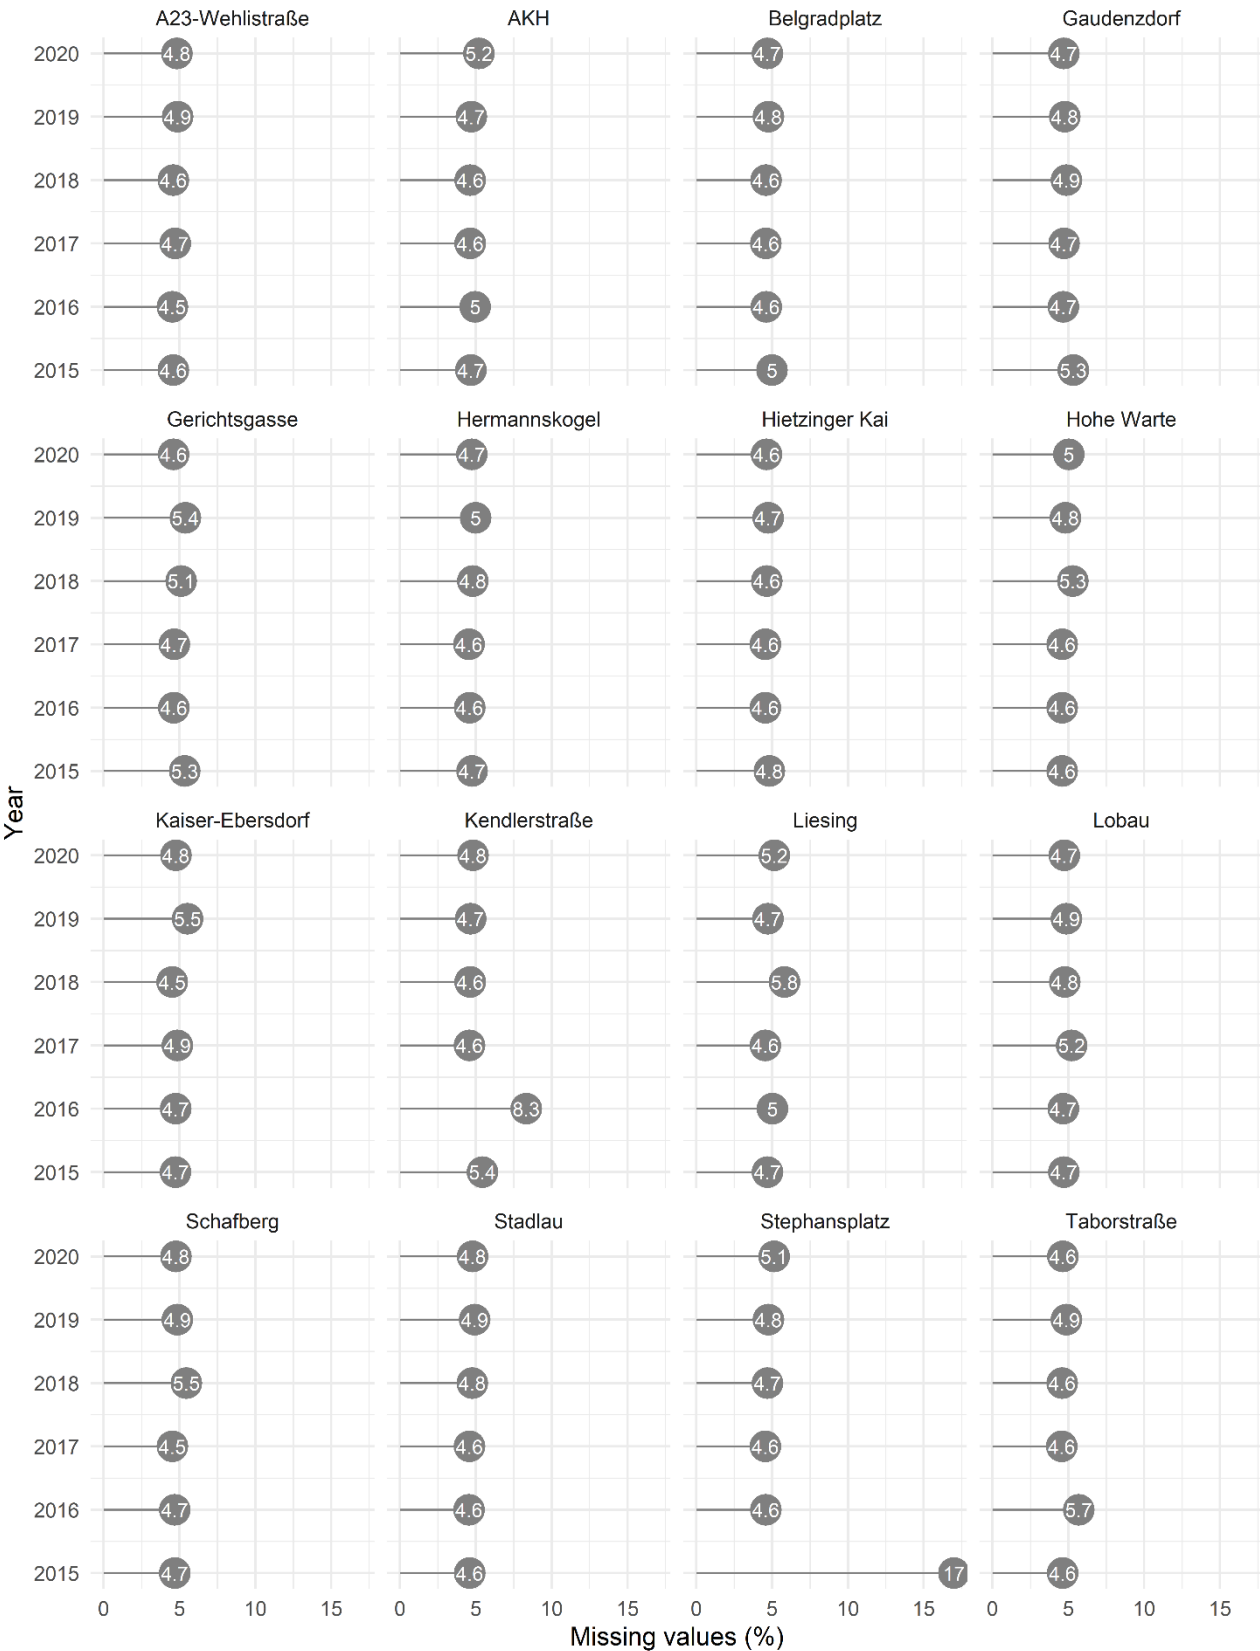

Figure S2. Frequency of missing values per air quality monitor per year. Pollutant: O<sub>3</sub>.

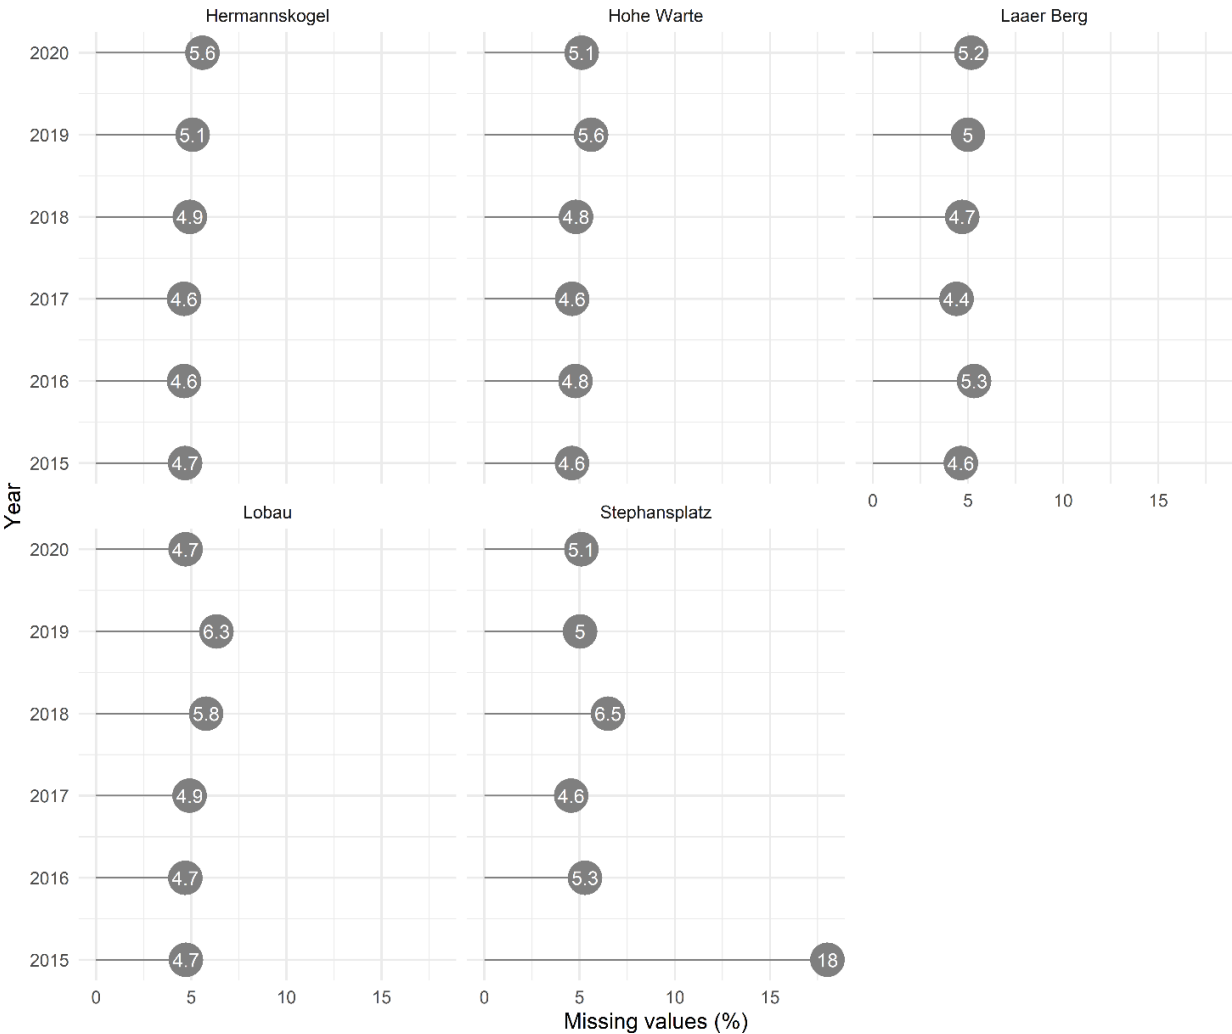

Figure S3. Frequency of missing values per air quality monitor per year. Pollutant: O<sub>x</sub>.

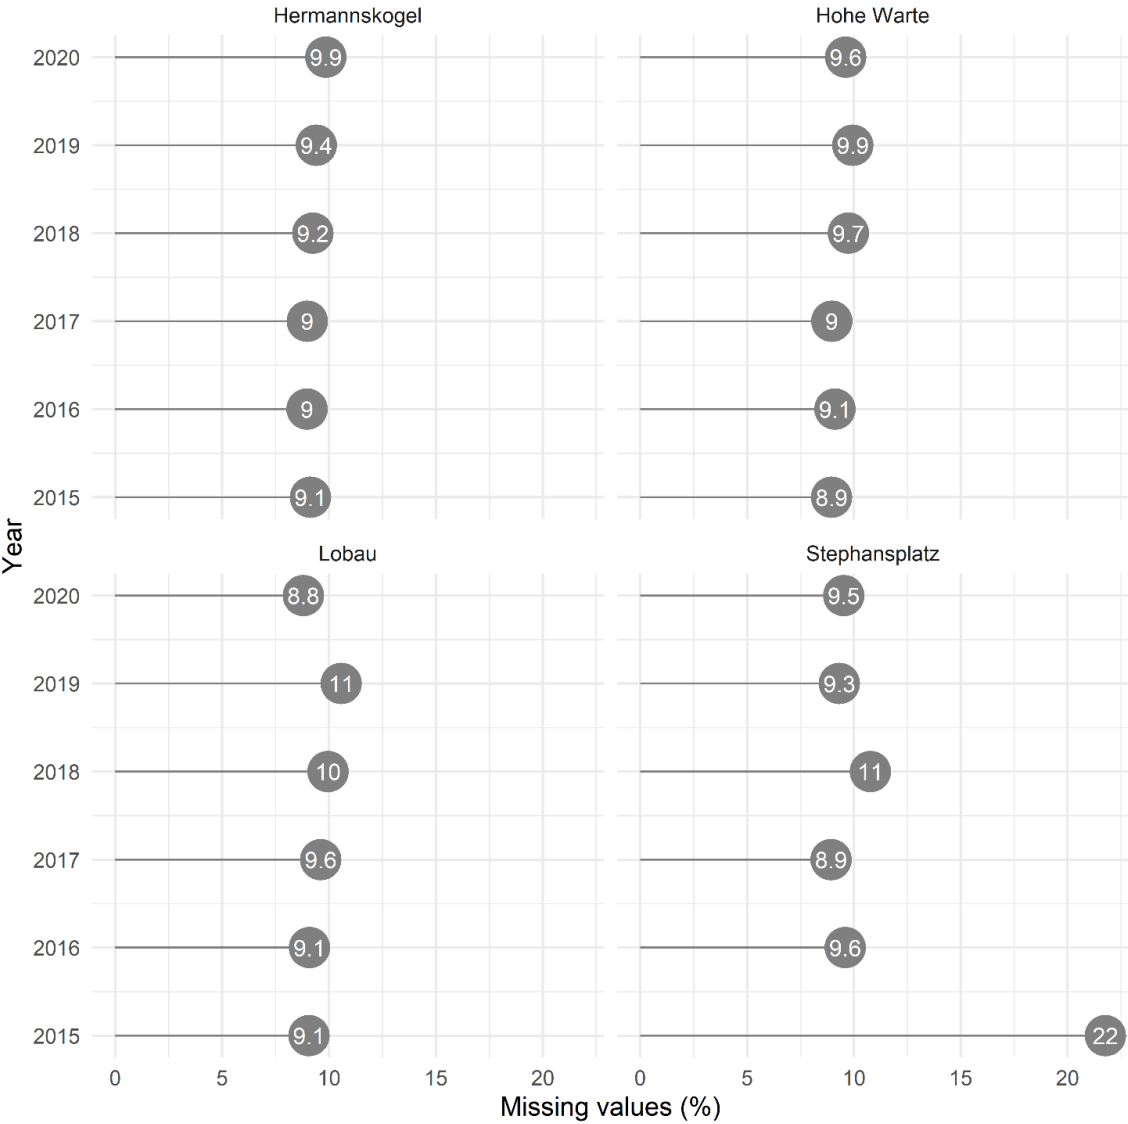

**Figure S4.** Wind roses for the five selected meteorological stations during 2015–2019. The annotations in green show mean wind speeds and calm wind frequencies. Calm winds were defined as having hourly speeds  $< 0.5 \text{ m s}^{-1}$ . The radial scale denotes the frequency of counts by wind direction sector.

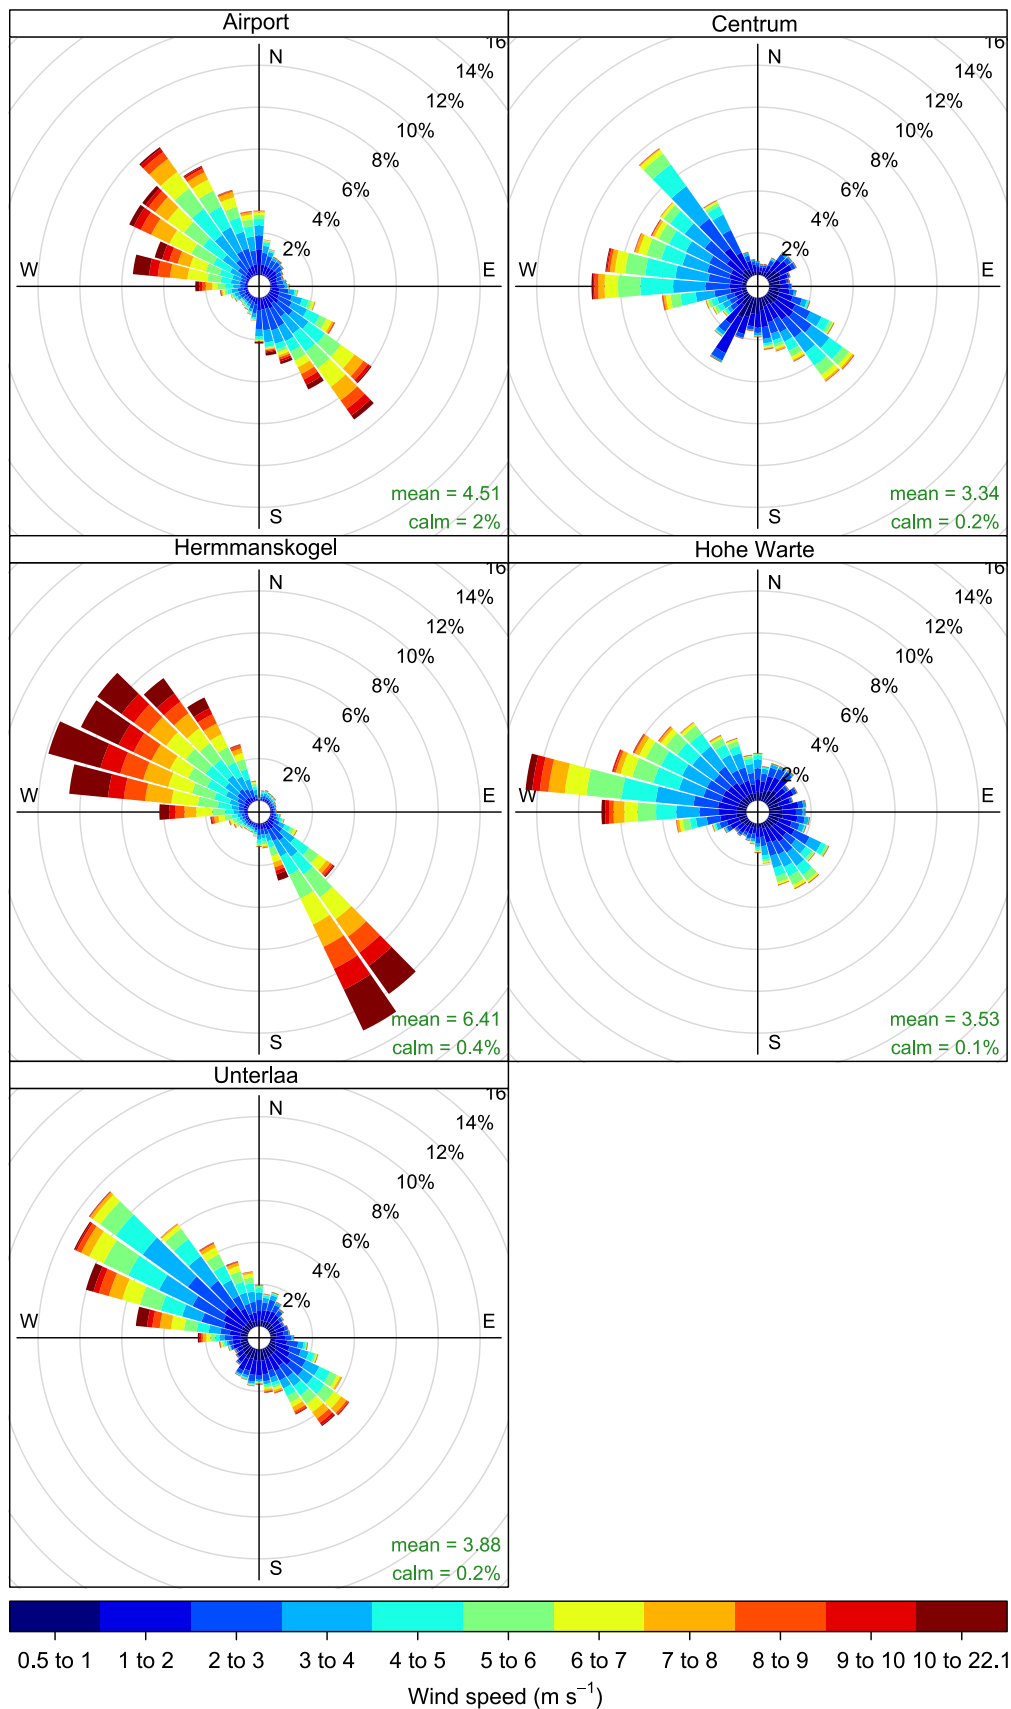

**Figure S5.** Seven-day rolling mean of NO<sub>2</sub> observations (*in blue*) against business as usual counterfactual predictions (*in red*). Shaded areas are the models' standard error. The time course in this figure is from February 16 to September 30, 2020. Dashed vertical lines indicate the LOCK-2020 period.

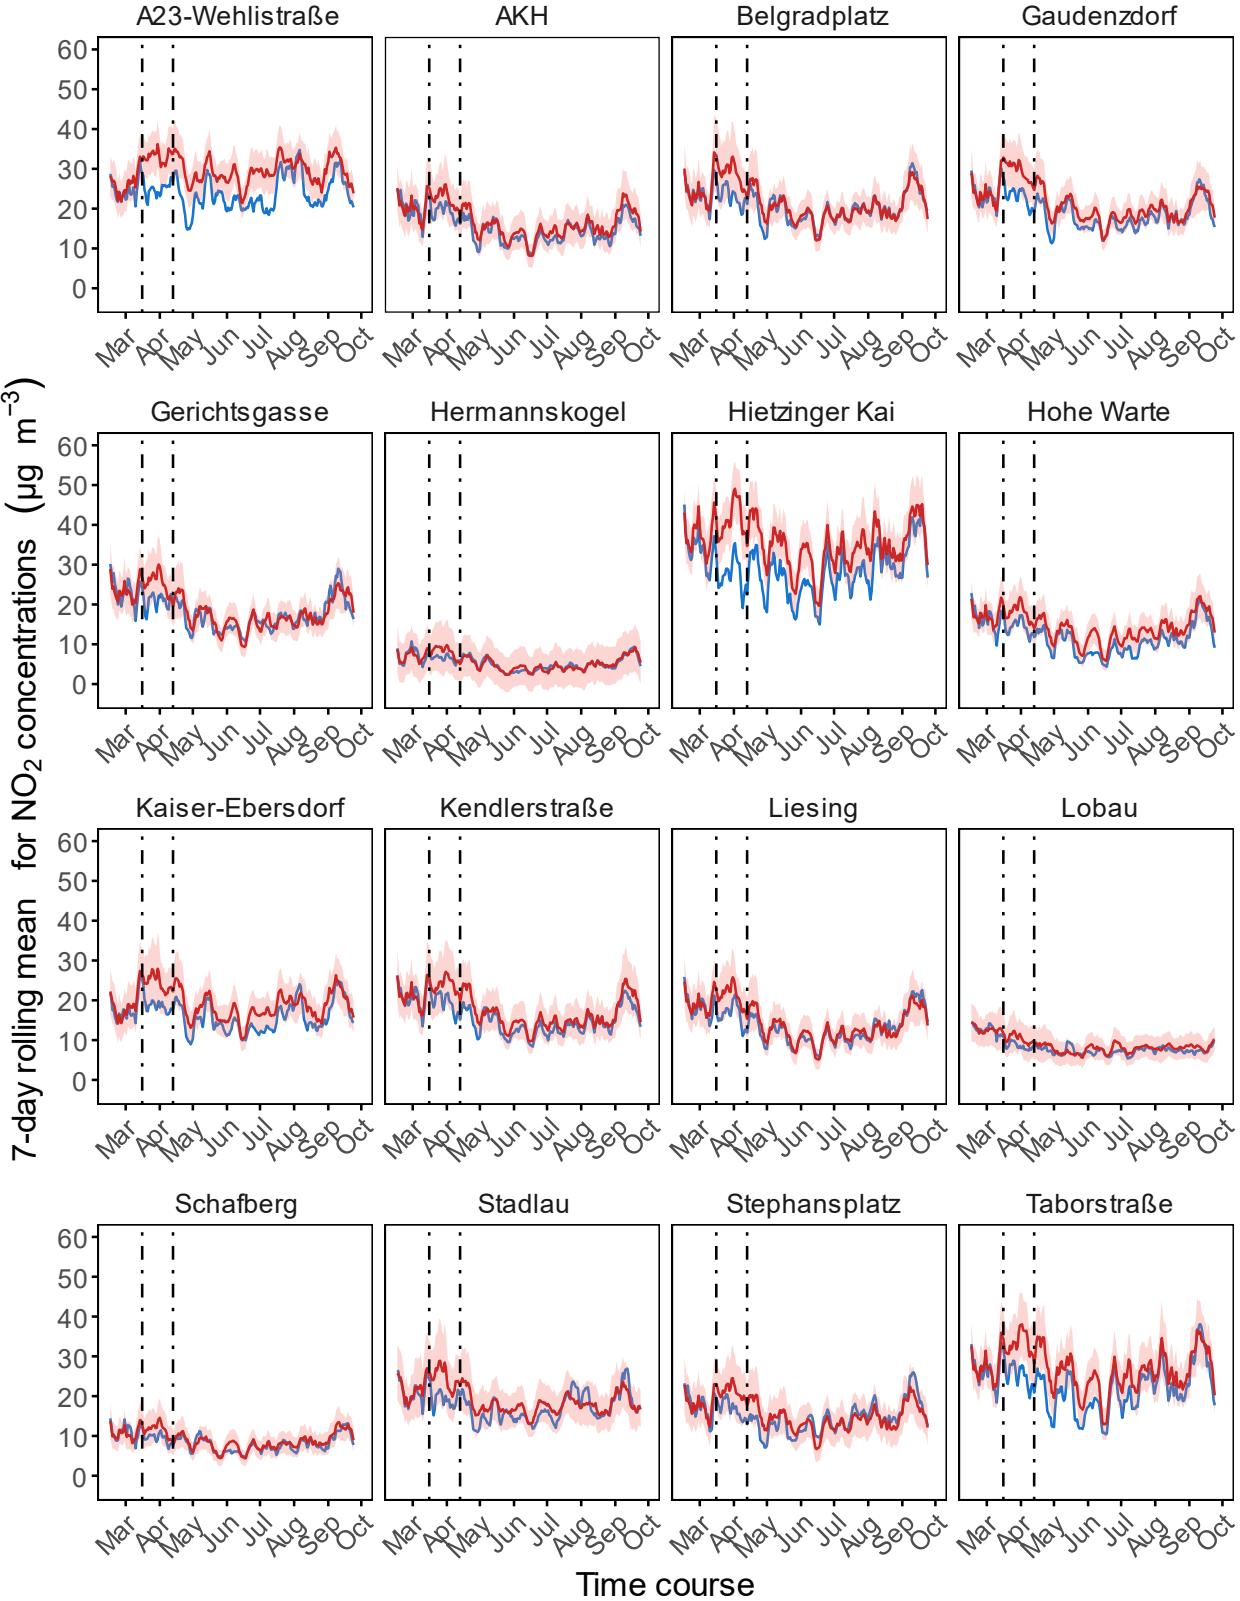

**Figure S6.** Seven-day rolling mean of O<sub>3</sub> observations (*in blue*) against business as usual counterfactual predictions (*in red*). Shaded areas are the models' standard error. The time course in this figure is from February 16 to September 30, 2020. Dashed vertical lines indicate the LOCK-2020 period.

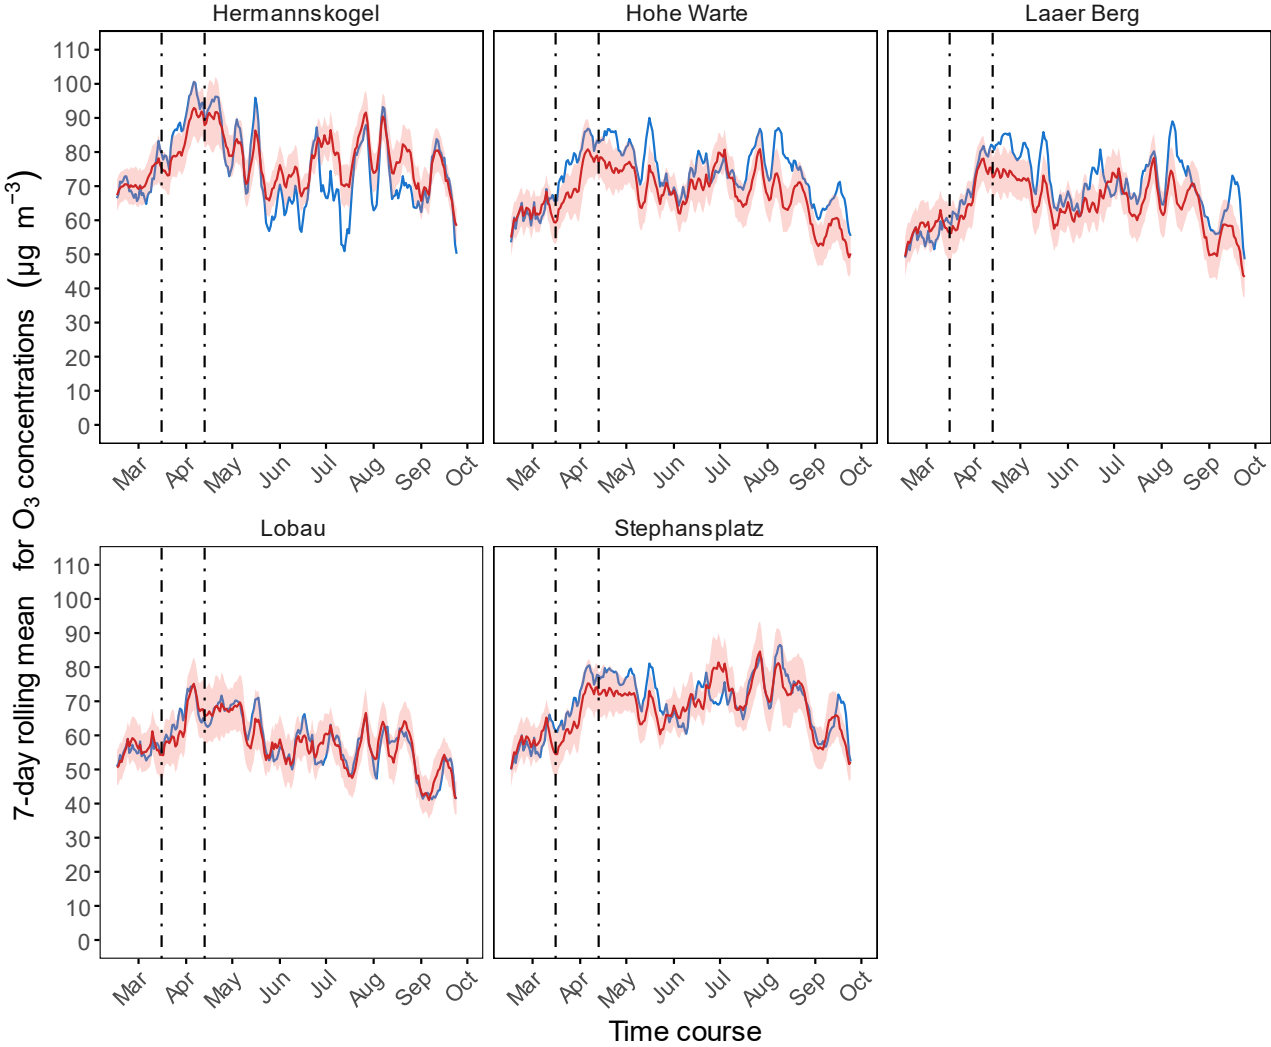



**Figure S7.** Seven-day rolling mean of O<sub>x</sub> observations (*in blue*) against business as usual counterfactual predictions (*in red*). Shaded areas are the models' standard error. The time course in this figure is from February 16 to September 30, 2020. Dashed vertical lines indicate the LOCK-2020 period.

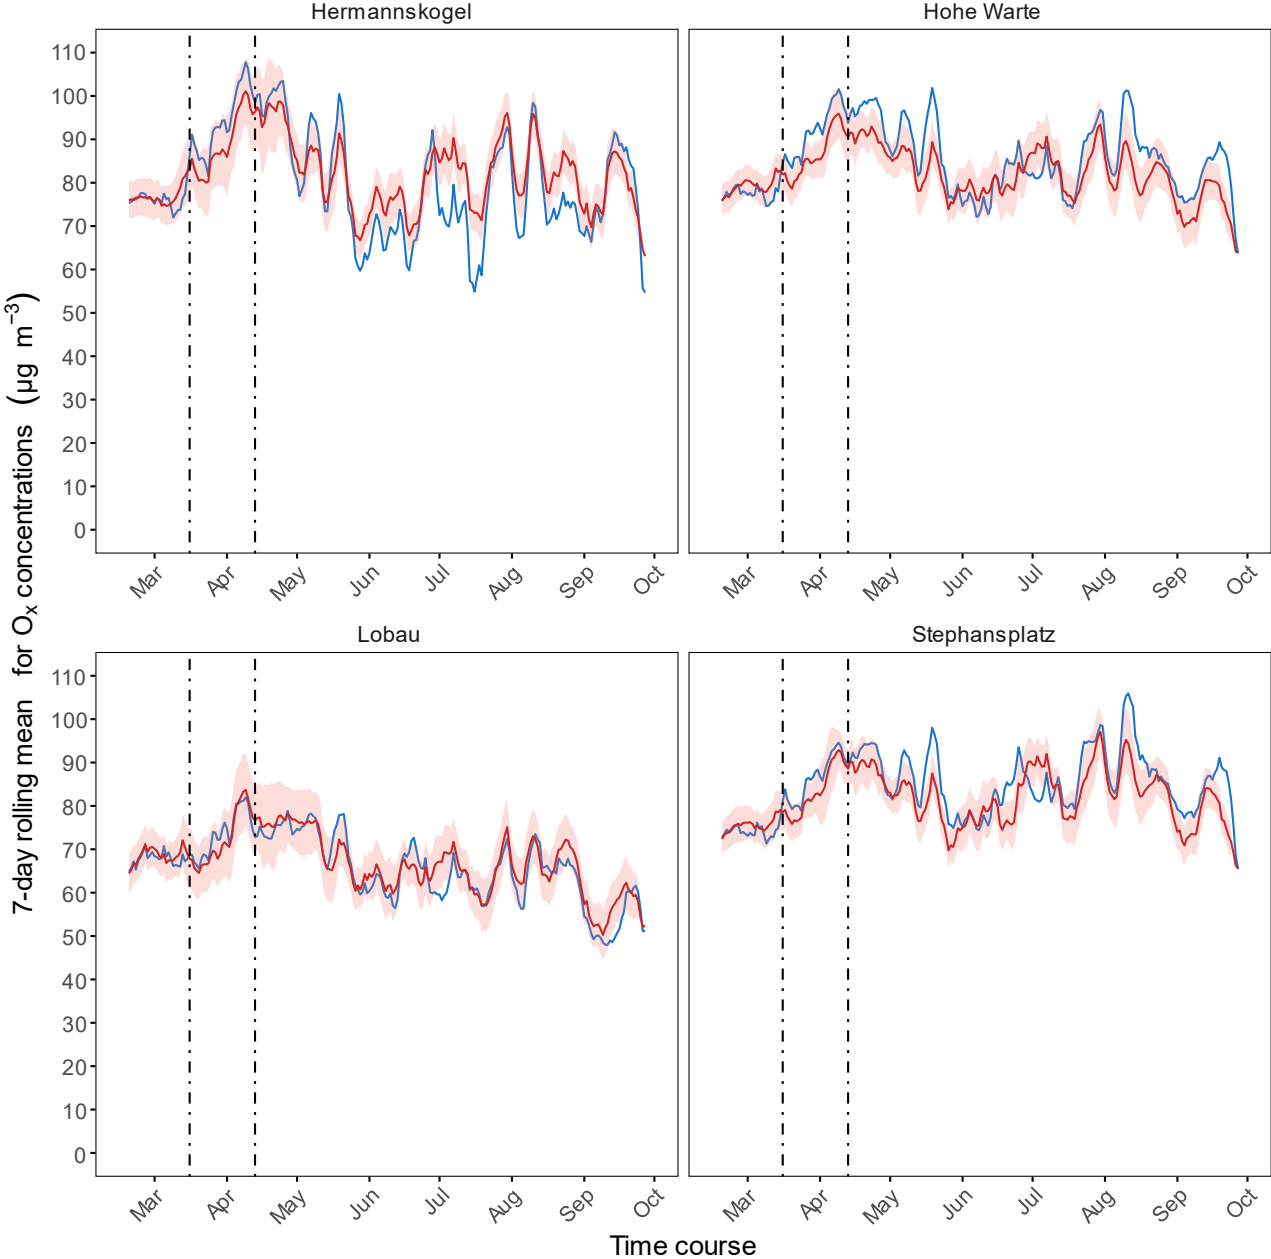

**Figure S8.** Austria's total anthropogenic NMVOC and NO<sub>x</sub> emissions, historical and projections, for the so-called 'fuel used' category. Scenario considered for the projections: with existing measures. Note that the separate plots were deliberately produced because the latest available projections are not based on the most up-to-date historical inventory. The references for the data sources used in this Figure are given in the main text of the publication.

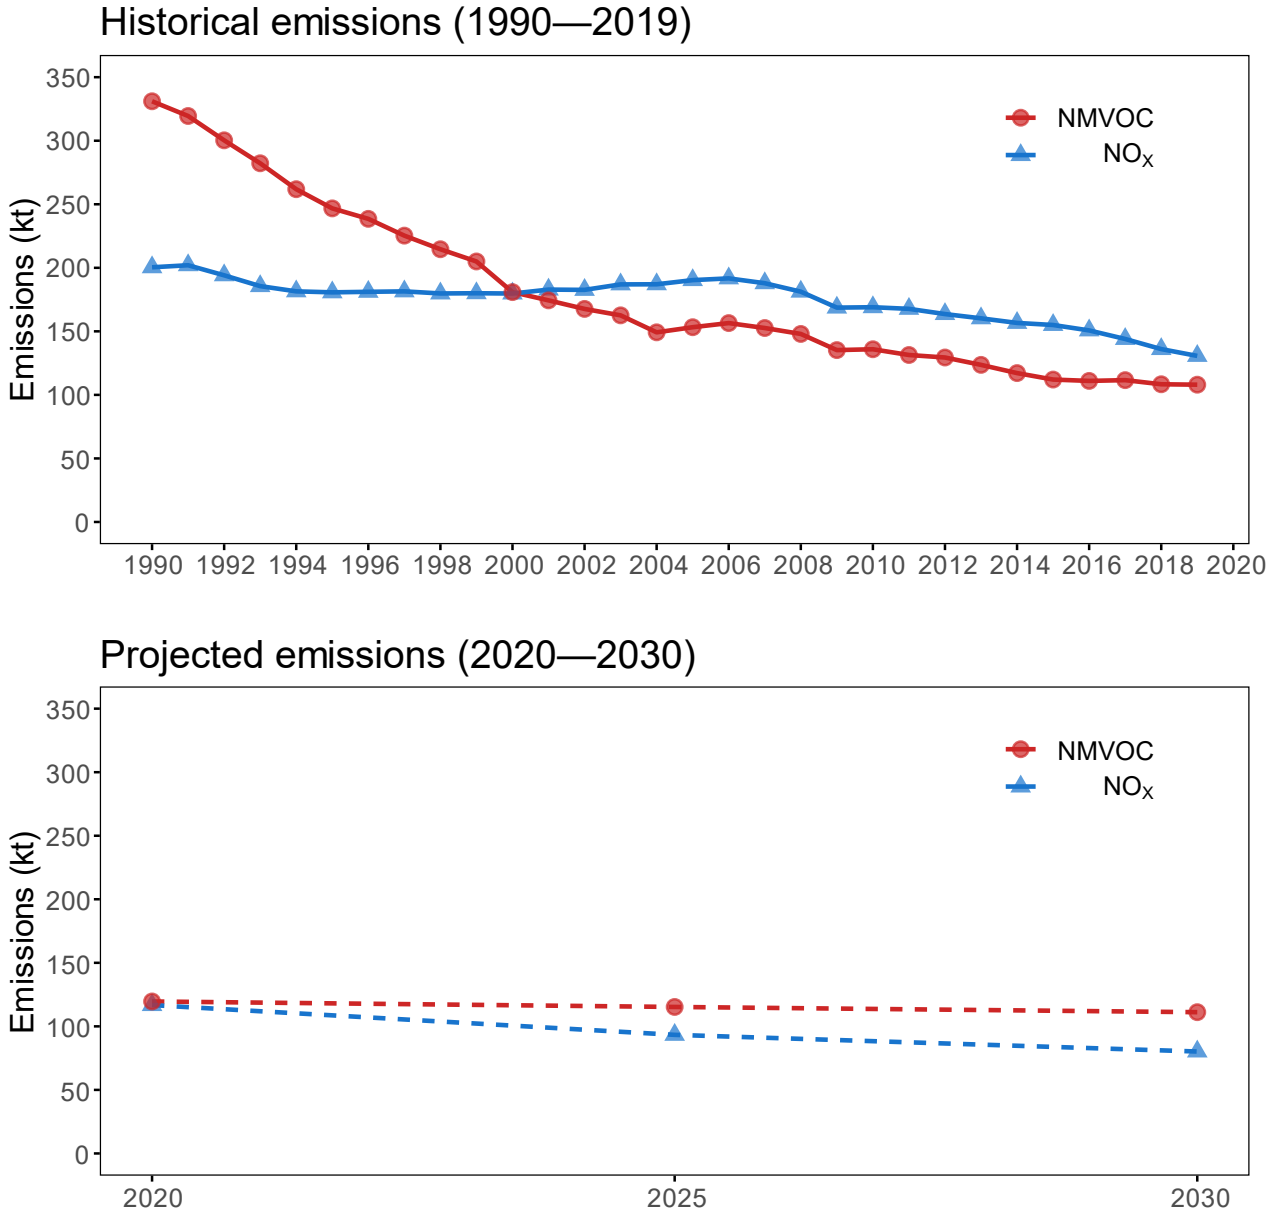

**Table S1.** Selected meteorological stations to match the air quality monitors.

| Air quality monitor |                                  |                     |               | Selected meteorological station |                          |
|---------------------|----------------------------------|---------------------|---------------|---------------------------------|--------------------------|
| Name                | Pollutant(s)                     | Environment         | Elevation (m) | Name                            | Distance to monitor (km) |
| A23-Wehlistrasse    | NO <sub>2</sub>                  | Urban traffic       | 162           | Schwechat                       | 14                       |
| AKH                 | NO <sub>2</sub>                  | Urban traffic       | 199           | Centrum                         | 3                        |
| Belgradplatz        | NO <sub>2</sub>                  | Urban traffic       | 218           | Centrum                         | 3                        |
| Gaudenzdorf         | NO <sub>2</sub>                  | Urban traffic       | 179           | Centrum                         | 2                        |
| Gerichtsgasse       | NO <sub>2</sub>                  | Urban traffic       | 164           | Hohe Warte                      | 3                        |
| Hermannskogel       | NO <sub>2</sub> , O <sub>3</sub> | Suburban background | 488           | Hermannskogel                   | 0                        |
| Hietzinger Kai      | NO <sub>2</sub>                  | Urban traffic       | 194           | Centrum                         | 5                        |
| Hohe Warte          | NO <sub>2</sub> , O <sub>3</sub> | Urban background    | 200           | Hohe Warte                      | 0                        |
| Kaiser-Ebersdorf    | NO <sub>2</sub>                  | Suburban industrial | 158           | Schwechat                       | 9                        |
| Kendlerstrasse      | NO <sub>2</sub>                  | Urban traffic       | 236           | Centrum                         | 4                        |
| Laaer Berg          | O <sub>3</sub>                   | Urban background    | 251           | Unterlaa                        | 3                        |
| Liesing             | NO <sub>2</sub>                  | Suburban traffic    | 217           | Unterlaa                        | 9                        |
| Lobau               | NO <sub>2</sub> , O <sub>3</sub> | Suburban background | 155           | Schwechat                       | 7                        |
| Schafberg           | NO <sub>2</sub>                  | Suburban background | 319           | Hohe Warte                      | 4                        |
| Stadlau             | NO <sub>2</sub>                  | Urban background    | 159           | Schwechat                       | 15                       |
| Stephansplatz       | NO <sub>2</sub> , O <sub>3</sub> | Urban background    | 172           | Centrum                         | 1                        |
| Taborstrasse        | NO <sub>2</sub>                  | Urban traffic       | 162           | Centrum                         | 2                        |

**Table S2.** Performance evaluation of the business as usual-related random forest models for the individual NO<sub>2</sub> air quality monitors. *Test* represents the metric results during the model training and development phase (1/Jan/2015–15/Feb/2020). *Verif* represents the metric results during the verification phase (16/Feb/2020–29/Feb/2020). Temporal resolution of data: hourly.

| Monitor          | FAC2 |       | MB   |       | RMSE |       | <i>r</i> |       | IOA  |       |
|------------------|------|-------|------|-------|------|-------|----------|-------|------|-------|
|                  | Test | Verif | Test | Verif | Test | Verif | Test     | Verif | Test | Verif |
| A23-Wehlistrasse | 0.96 | 0.86  | 0.3  | 4.7   | 10.0 | 10.6  | 0.84     | 0.76  | 0.76 | 0.65  |
| AKH              | 0.96 | 0.85  | 0.2  | 3.0   | 8.3  | 12.4  | 0.87     | 0.75  | 0.79 | 0.68  |
| Belgradplatz     | 0.97 | 0.91  | 0.2  | 3.8   | 8.4  | 10.5  | 0.87     | 0.82  | 0.78 | 0.71  |
| Gaudenzdorf      | 0.97 | 0.91  | 0.2  | 2.4   | 8.2  | 11.1  | 0.87     | 0.80  | 0.78 | 0.72  |
| Gerichtsgasse    | 0.94 | 0.89  | 0.1  | -0.7  | 9.8  | 13.1  | 0.84     | 0.70  | 0.76 | 0.67  |
| Hermannskogel    | 0.93 | 0.79  | 0.1  | 1.9   | 4.2  | 4.4   | 0.89     | 0.82  | 0.81 | 0.67  |
| Hietzinger Kai   | 0.97 | 0.88  | 0.2  | 3.4   | 10.9 | 12.8  | 0.91     | 0.85  | 0.81 | 0.75  |
| Hohe Warte       | 0.94 | 0.87  | 0.1  | 0.8   | 7.6  | 10.0  | 0.86     | 0.78  | 0.79 | 0.74  |
| Kaiser-Ebersdorf | 0.95 | 0.87  | 0.0  | 2.1   | 8.1  | 8.4   | 0.85     | 0.78  | 0.76 | 0.70  |
| Kendlerstrasse   | 0.95 | 0.89  | 0.1  | 3.4   | 8.0  | 10.7  | 0.86     | 0.79  | 0.77 | 0.69  |
| Liesing          | 0.94 | 0.75  | 0.3  | 3.5   | 7.9  | 11.5  | 0.88     | 0.79  | 0.79 | 0.71  |
| Lobau            | 0.94 | 0.82  | 0.1  | 3.8   | 5.1  | 6.4   | 0.82     | 0.68  | 0.74 | 0.53  |
| Schafberg        | 0.91 | 0.80  | 0.0  | 2.1   | 6.4  | 7.3   | 0.86     | 0.73  | 0.79 | 0.68  |
| Stadlau          | 0.95 | 0.88  | 0.2  | 3.6   | 8.5  | 11.2  | 0.85     | 0.73  | 0.77 | 0.66  |
| Stephansplatz    | 0.95 | 0.85  | 0.1  | 4.3   | 8.8  | 10.8  | 0.86     | 0.78  | 0.78 | 0.67  |
| Taborstrasse     | 0.97 | 0.93  | 0.0  | 2.9   | 9.5  | 9.8   | 0.88     | 0.87  | 0.80 | 0.75  |

FAC2: Fraction of predictions within a factor of two of observations  
 MB: Mean bias  
 RMSE: Root mean square error  
*r*: Pearson correlation coefficient  
 IOA: Index of agreement

**Table S3.** Performance evaluation of the business as usual-related random forest models for the individual O<sub>3</sub> air quality monitors. *Test* represents the metric results during the model training and development phase (1/Jan/2015–15/Feb/2020). *Verif* represents the metric results during the verification phase (16/Feb/2020–29/Feb/2020). Temporal resolution of data: hourly.

| Monitor       | FAC2 |       | MB   |       | RMSE |       | <i>r</i> |       | IOA  |       |
|---------------|------|-------|------|-------|------|-------|----------|-------|------|-------|
|               | Test | Verif | Test | Verif | Test | Verif | Test     | Verif | Test | Verif |
| Hermannskogel | 0.99 | 1.00  | -0.1 | 1.2   | 9.1  | 9.0   | 0.95     | 0.54  | 0.86 | 0.59  |
| Hohe Warte    | 0.93 | 0.92  | -0.1 | 0.6   | 11.1 | 13.0  | 0.94     | 0.80  | 0.84 | 0.73  |
| Laaer Berg    | 0.93 | 0.94  | -0.4 | 3.9   | 10.5 | 11.8  | 0.94     | 0.74  | 0.85 | 0.66  |
| Lobau         | 0.91 | 0.97  | 0.2  | 1.5   | 10.1 | 9.7   | 0.95     | 0.82  | 0.86 | 0.72  |
| Stephansplatz | 0.92 | 0.93  | -0.1 | 0.9   | 11.0 | 12.2  | 0.93     | 0.76  | 0.84 | 0.69  |

**Table S4.** Performance evaluation of the business as usual-related random forest models for the individual O<sub>x</sub> air quality monitors. *Test* represents the metric results during the model training and development phase (1/Jan/2015–15/Feb/2020). *Verif* represents the metric results during the verification phase (16/Feb/2020–29/Feb/2020). Temporal resolution of data: hourly.

| Monitor       | FAC2 |       | MB   |       | RMSE |       | <i>r</i> |       | IOA  |       |
|---------------|------|-------|------|-------|------|-------|----------|-------|------|-------|
|               | Test | Verif | Test | Verif | Test | Verif | Test     | Verif | Test | Verif |
| Hermannskogel | 1.00 | 1.00  | 0.0  | 3.5   | 7.7  | 7.2   | 0.96     | 0.56  | 0.87 | 0.50  |
| Hohe Warte    | 1.00 | 1.00  | -0.1 | 0.1   | 8.1  | 6.9   | 0.95     | 0.73  | 0.85 | 0.66  |
| Lobau         | 0.99 | 0.99  | 0.1  | 3.8   | 9.4  | 8.5   | 0.95     | 0.81  | 0.85 | 0.66  |
| Stephansplatz | 1.00 | 1.00  | 0.0  | 4.6   | 7.4  | 8.3   | 0.95     | 0.58  | 0.86 | 0.47  |
